# Supplementary material for: Vitamin C for preventing atrial fibrillation in high risk patients: a systematic review and meta-analysis
Source: PubMed Central journal article supplement (PMC5286679; doi:10.1186/s12872-017-0478-5), 2017-02-01

# Vitamin C for preventing atrial fibrillation in high risk patients: a systematic review and meta-analysis

**Harri Hemilä and Timo Suonsyrjä**

BMC Cardiovascular Disorders

<https://bmccardiovascdisord.biomedcentral.com/>

DOI 10.1186/s12872-017-0478-5

<https://dx.doi.org/10.1186/s12872-017-0478-5>

## **Additional file 2**

version 2017-1-27

**Harri Hemilä**

Department of Public Health, POB 20

University of Helsinki

Tukholmankatu 8 B 2B

FI-00014 Helsinki

Finland

E-mail: [harri.hemila@helsinki.fi](mailto:harri.hemila@helsinki.fi)

Home page: <http://www.mv.helsinki.fi/home/hemila>

## **Contents**

Page

- 2 Transformation of hospital stay to %-scale
- 3 Transformation of ICU data from days to %-scale
- 4 AF in the 10 non-US trials
- 5 AF in the 10 non-US trials: exclusion of 4 trials with some concerns about randomization and blinding
- 6 Comparison of the 5 US and 5 Iran POAF trials
- 7 Hospital stay in the non-US trials
- 8 Hospital stay in the non-US trials: exclusion of 1 trial with some concerns about blinding

## Transformation of hospital stay to %-scale

### Reported hospital stay in days

| Hospital stay  | Vit C |      |     | Placebo |      |     |
|----------------|-------|------|-----|---------|------|-----|
|                | mean  | SD   | N   | mean    | SD   | N   |
| Antonic        | 9.37  | 5.27 | 52  | 8.77    | 5.27 | 53  |
| Bjordahl       | 10.4  | 4.0  | 89  | 11.7    | 7.1  | 96  |
| Colby          | 14.6  | 17.6 | 13  | 10.2    | 4.9  | 11  |
| Dehghani       | 5.32  | 0.59 | 50  | 5.74    | 1.3  | 50  |
| Donovan        | 6.8   | 3.6  | 150 | 6.8     | 4.9  | 154 |
| Eslami         | 6.54  | 3.24 | 50  | 7.08    | 3.45 | 50  |
| Papoulidis     | 7.9   | 6.0  | 85  | 9.8     | 6.0  | 85  |
| Polymeropoulos | 11.27 | 5.31 | 11  | 12.73   | 6.6  | 11  |
| Sadeghpour     | 10.17 | 5.9  | 113 | 12.0    | 5.9  | 177 |
| Sarzaeem       | 6.67  | 1.5  | 85  | 8.2     | 2.3  | 85  |
| vanWagoner     | 6.53  | 3.15 | 172 | 6.62    | 3.15 | 166 |

### Calculated hospital stay with Placebo group mean = 100% These values are used for the primary analysis

| Hospital stay  | Vit C     |         |     | Placebo    |         |     |
|----------------|-----------|---------|-----|------------|---------|-----|
|                | mean<br>% | SD<br>% | N   | mean<br>%  | SD<br>% | N   |
| Antonic        | 106.84    | 60      | 52  | <b>100</b> | 60      | 53  |
| Bjordahl       | 88.89     | 34      | 89  | <b>100</b> | 61      | 96  |
| Colby          | 143.14    | 173     | 13  | <b>100</b> | 48      | 11  |
| Dehghani       | 92.68     | 10      | 50  | <b>100</b> | 23      | 50  |
| Donovan        | 100.0     | 53      | 150 | <b>100</b> | 72      | 154 |
| Eslami         | 92.37     | 46      | 50  | <b>100</b> | 49      | 50  |
| Papoulidis     | 80.61     | 61      | 85  | <b>100</b> | 61      | 85  |
| Polymeropoulos | 88.53     | 42      | 11  | <b>100</b> | 52      | 11  |
| Sadeghpour     | 84.75     | 49      | 113 | <b>100</b> | 49      | 177 |
| Sarzaeem       | 81.34     | 18      | 85  | <b>100</b> | 28      | 85  |
| vanWagoner     | 98.63     | 48      | 172 | <b>100</b> | 48      | 166 |

For example,

In the Antonic (2016) trial,

vitamin C group duration is  $9.37/8.77 = 1.0684 = 106.84\%$  of the placebo group duration

## Transformation of ICU data from days to %-scale

### Reported ICU stay

| ICU stay (days) | Vit C |       | N   | Placebo |      | N   |
|-----------------|-------|-------|-----|---------|------|-----|
|                 | mean  | SD    |     | mean    | SD   |     |
| Antonic         | 1.5   | 1.3   | 52  | 1.3     | 1.3  | 53  |
| Bjordahl        | 3.7   | 2.2   | 89  | 4.3     | 2.9  | 96  |
| Colby           | 4.43  | 10.41 | 13  | 2.04    | 1.8  | 11  |
| Dehghani        | 1.79  | 0.31  | 50  | 2.1     | 0.61 | 50  |
| Donovan         | 2,0   | 1.3   | 150 | 1.9     | 1.5  | 154 |
| Eslami          | 2.3   | 1.6   | 50  | 2.6     | 1.48 | 50  |
| Papoulidis      | 1.6   | 1.66  | 85  | 2.1     | 1.66 | 85  |
| Sadeghpour      | 3.42  | 1.06  | 113 | 3.43    | 1.09 | 177 |
| Sarzaeem        | 2.51  | 1.4   | 85  | 3,0     | 1.6  | 85  |

### Calculated stay with Placebo group mean = 100% These values are used for the analysis

|            | Vit C  |     | N   | Placebo    |     | N   |
|------------|--------|-----|-----|------------|-----|-----|
|            | mean   | SD  |     | mean       | SD  |     |
|            | %      | %   |     | %          | %   |     |
| Antonic    | 115.38 | 100 | 52  | <b>100</b> | 100 | 53  |
| Bjordahl   | 86.05  | 51  | 89  | <b>100</b> | 67  | 96  |
| Colby      | 217.59 | 511 | 13  | <b>100</b> | 88  | 11  |
| Dehghani   | 85.24  | 15  | 50  | <b>100</b> | 29  | 50  |
| Donovan    | 105.26 | 68  | 150 | <b>100</b> | 79  | 154 |
| Eslami     | 88.46  | 62  | 50  | <b>100</b> | 57  | 50  |
| Papoulidis | 76.19  | 79  | 85  | <b>100</b> | 79  | 85  |
| Sadeghpour | 99.71  | 31  | 113 | <b>100</b> | 32  | 177 |
| Sarzaeem   | 83.67  | 47  | 85  | <b>100</b> | 53  | 85  |

## AF in the 10 non-US trials

If the 5 US trials are removed, the remaining 10 non-US trials are not heterogeneous,  $I^2 = 38\%$  ( $P = 0.10$ ), and the pooled estimate indicates a **45% decrease (95% CI 35% to 54%;  $Z = 6.60$ ,  $P = 10^{-10}$ )** in the occurrence of AF.

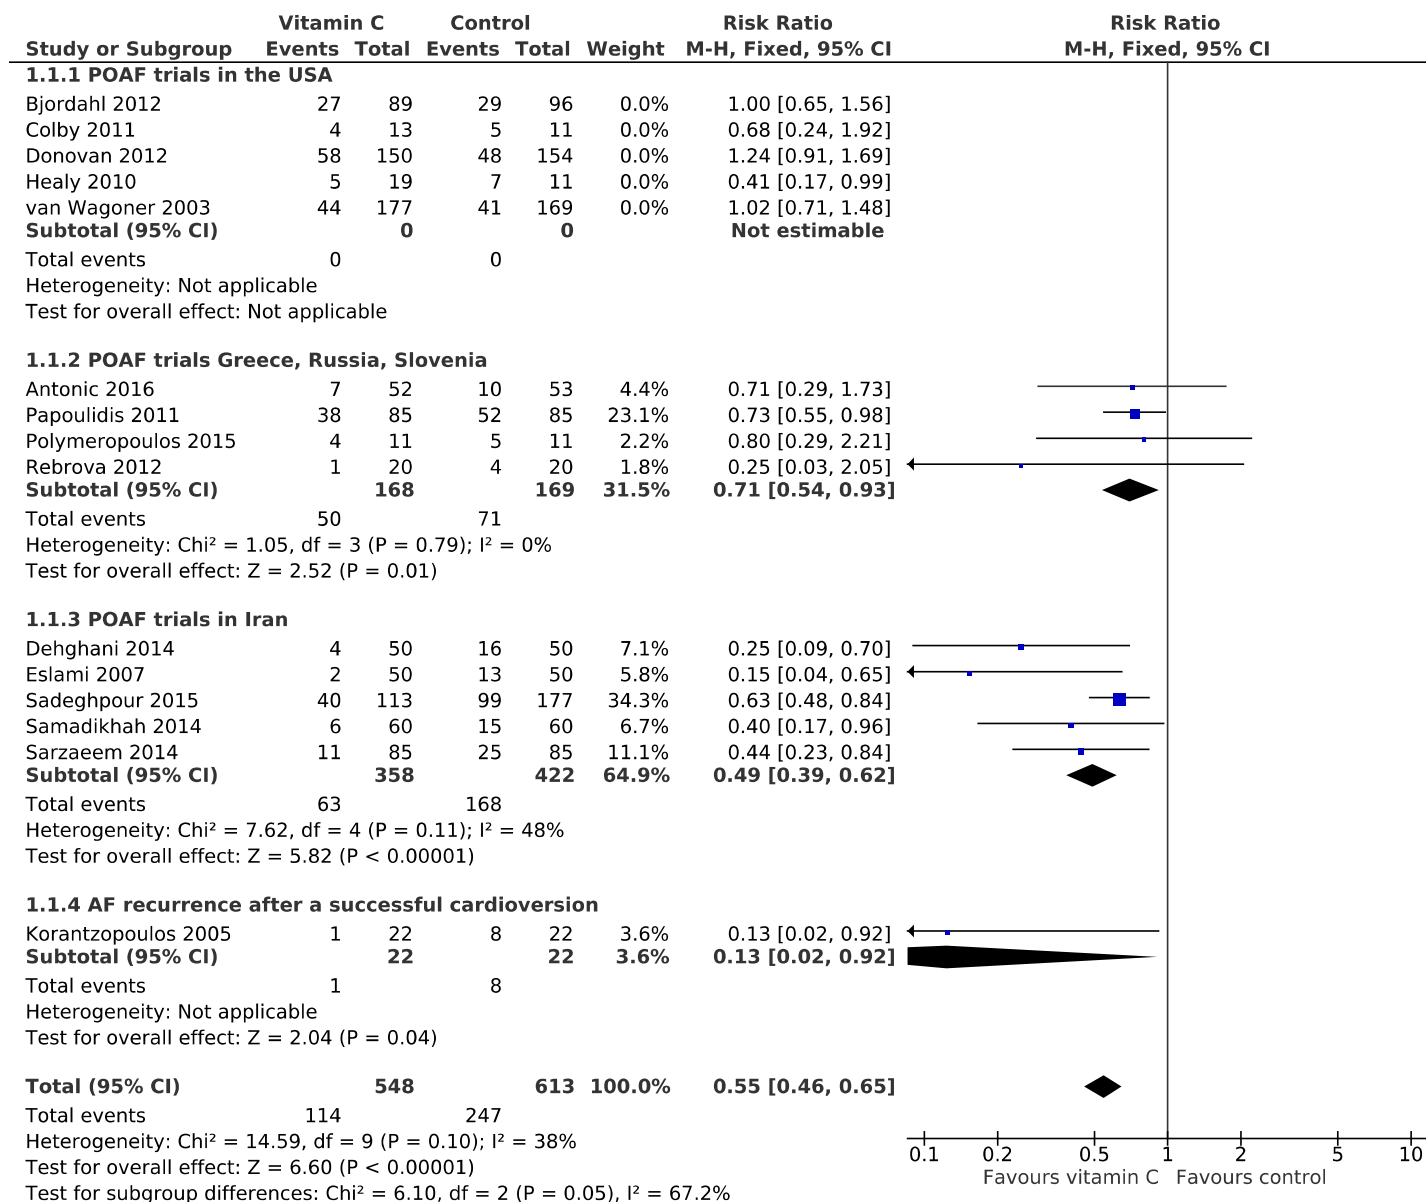

## Exclusion of 4 trials with some concerns about randomization and blinding

If we further remove 4 non-US trials that had some concerns about randomization or blinding [23,24,31,32], the effect estimate is essentially the same leading to **48% decrease (95% CI 34% to 60%; Z = 5.30, P = 10<sup>-7</sup>)** in the incidence of AF.

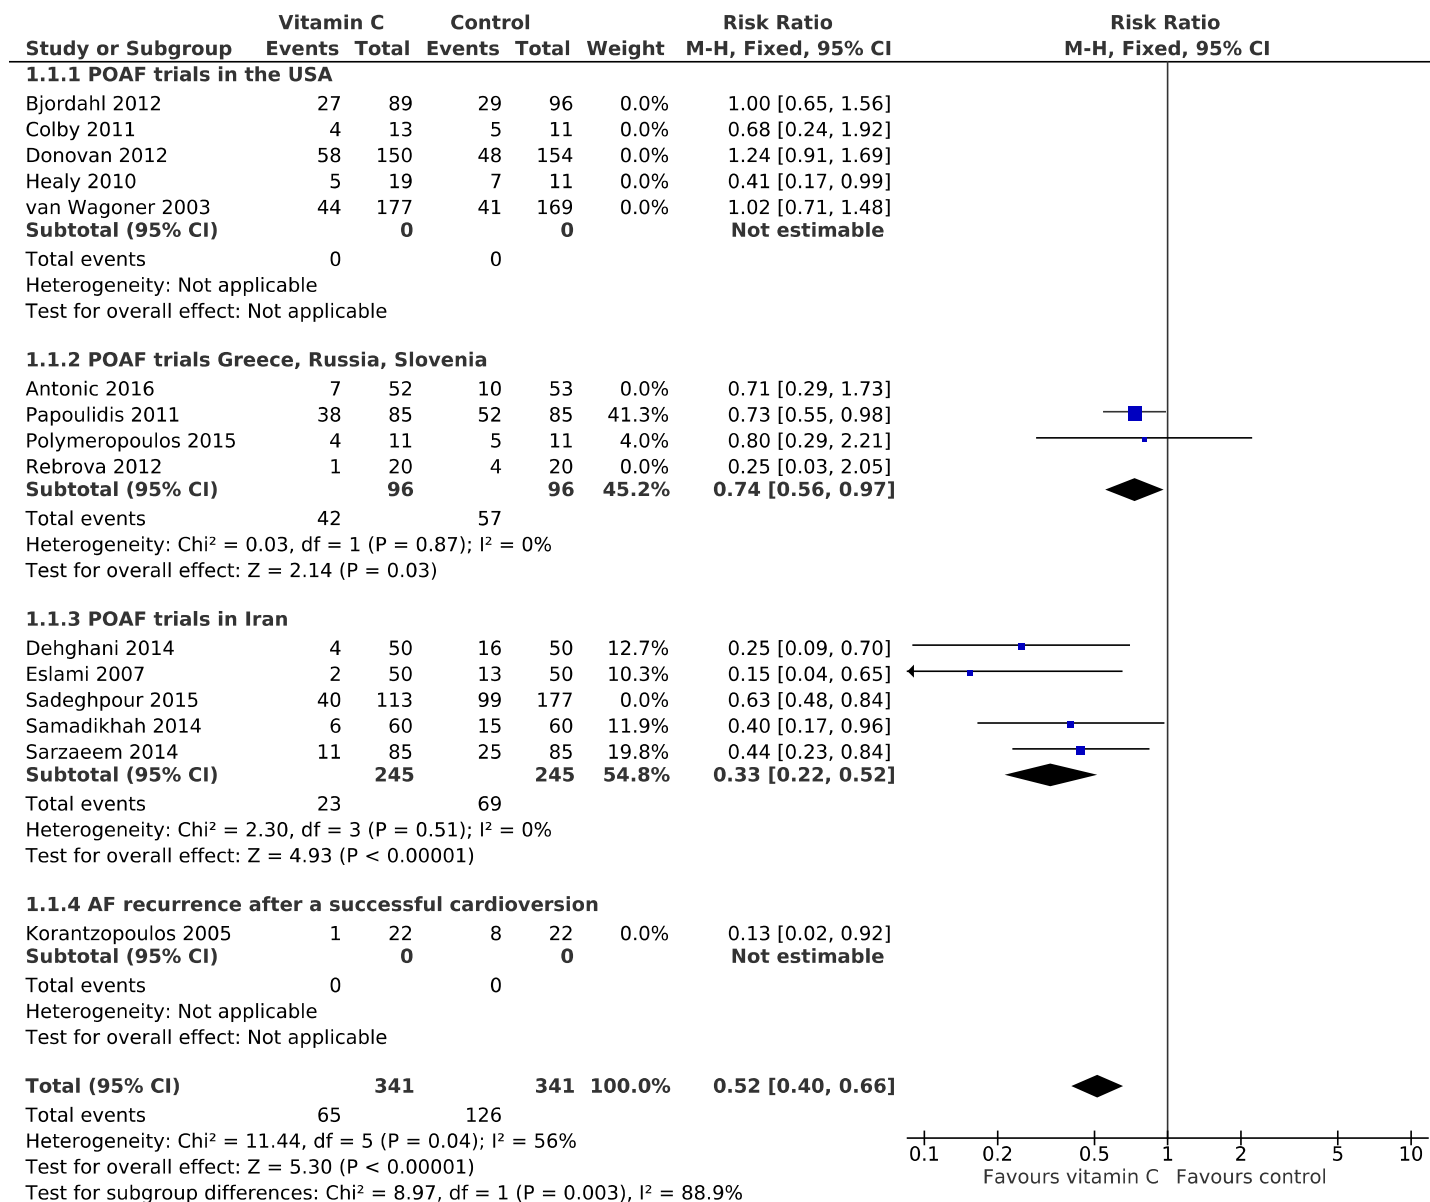

# Comparison of the 5 US and 5 Iran POAF trials

In a direct comparison of the 5 US POAF trials against the 5 Iran POAF trials, there is very strong evidence of heterogeneity with  $I^2 = 95\%$ ;  $P = 10^{-5}$  in heterogeneity test.

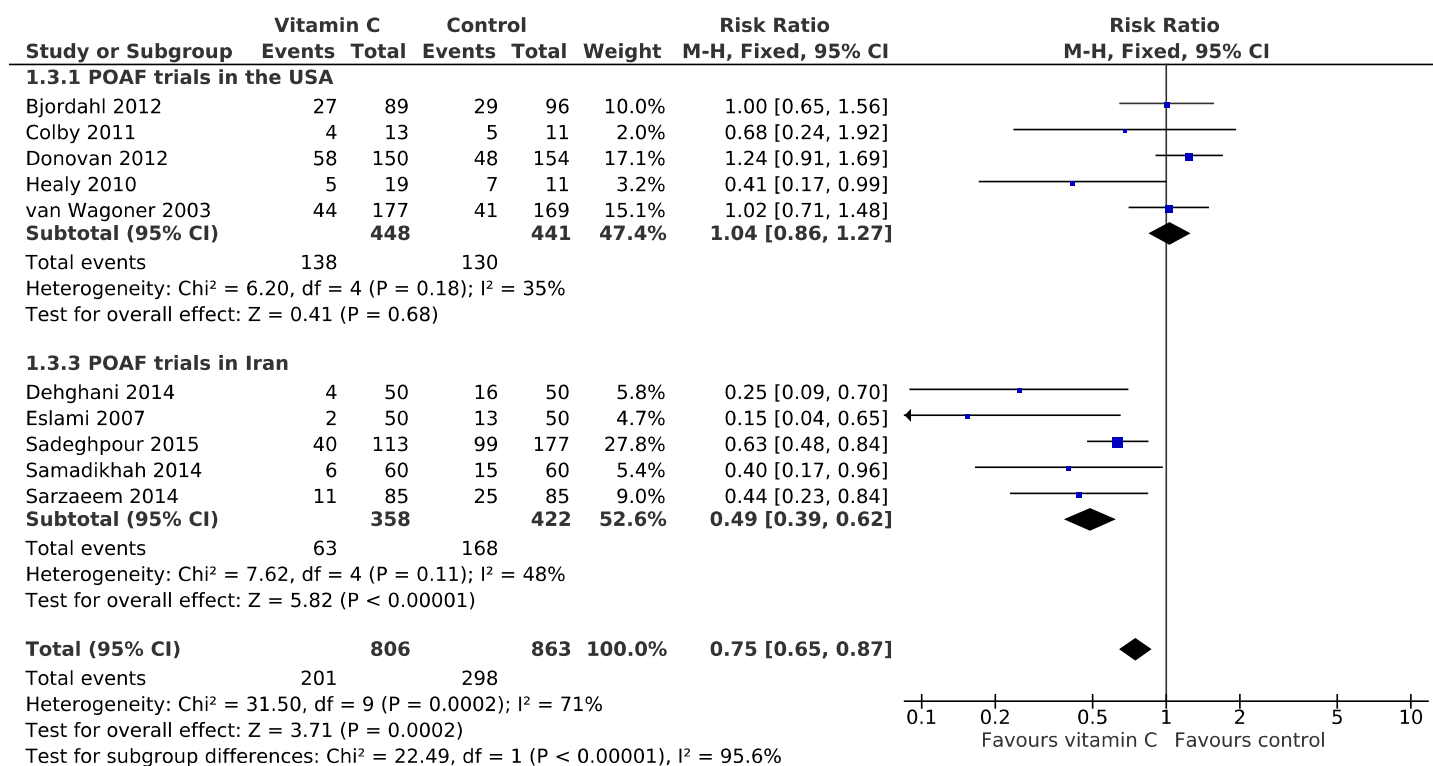

# Hospital stay in the non-US trials

In the non-US cardiac surgery trials, vitamin C decreased the length of hospital stay by 12.6% (95% CI 8.4% to 16.8%; Z = 5.87, P = 10<sup>-8</sup>).

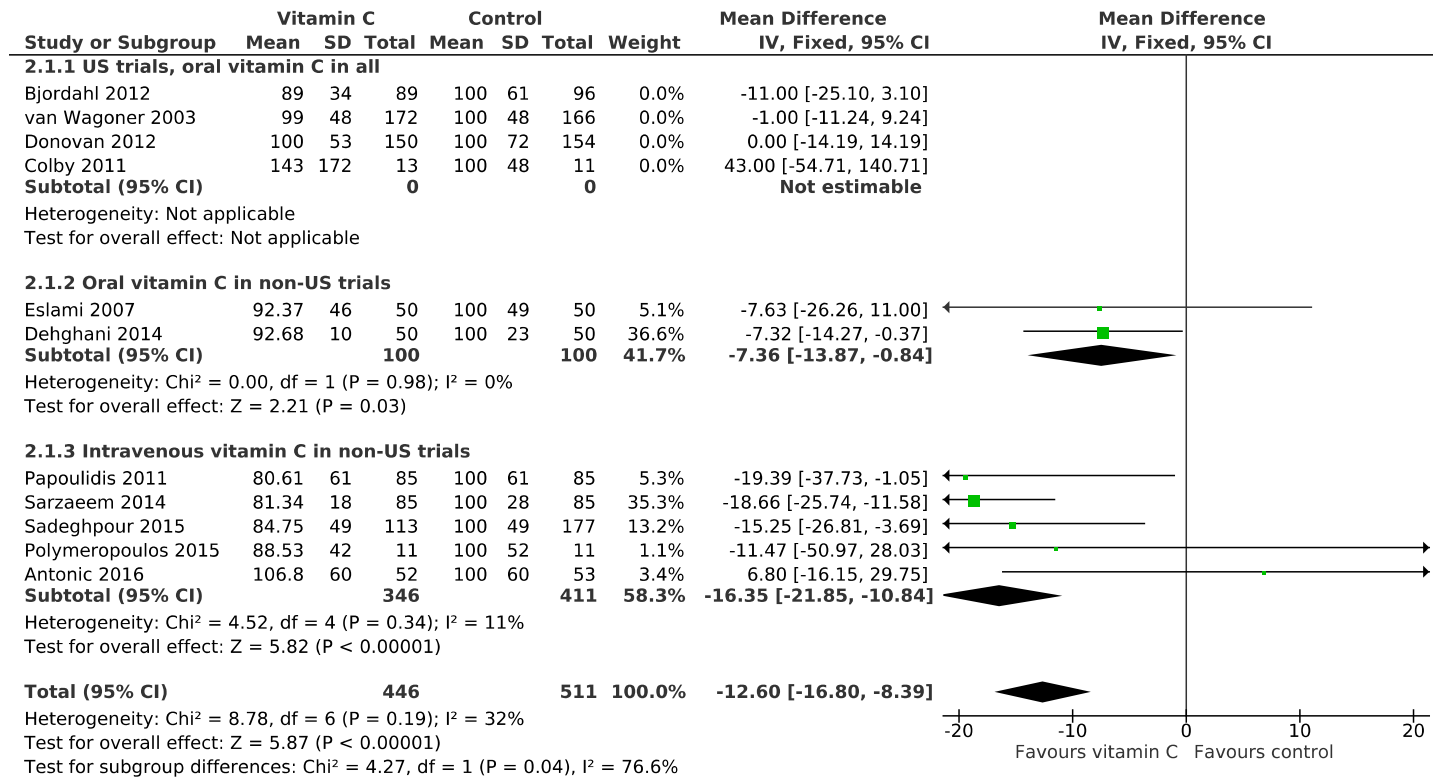

## Exclusion of 1 trial with some concerns about blinding

Only 1 of the non-US trials had some concerns about blinding [23], and its exclusion had only a small effect on the pooled effect estimate leading to **13.3% decrease (12.1% to 23.4%);**

**Z = 6.08, P = 10<sup>-9</sup>** decrease in the length of hospital stay.

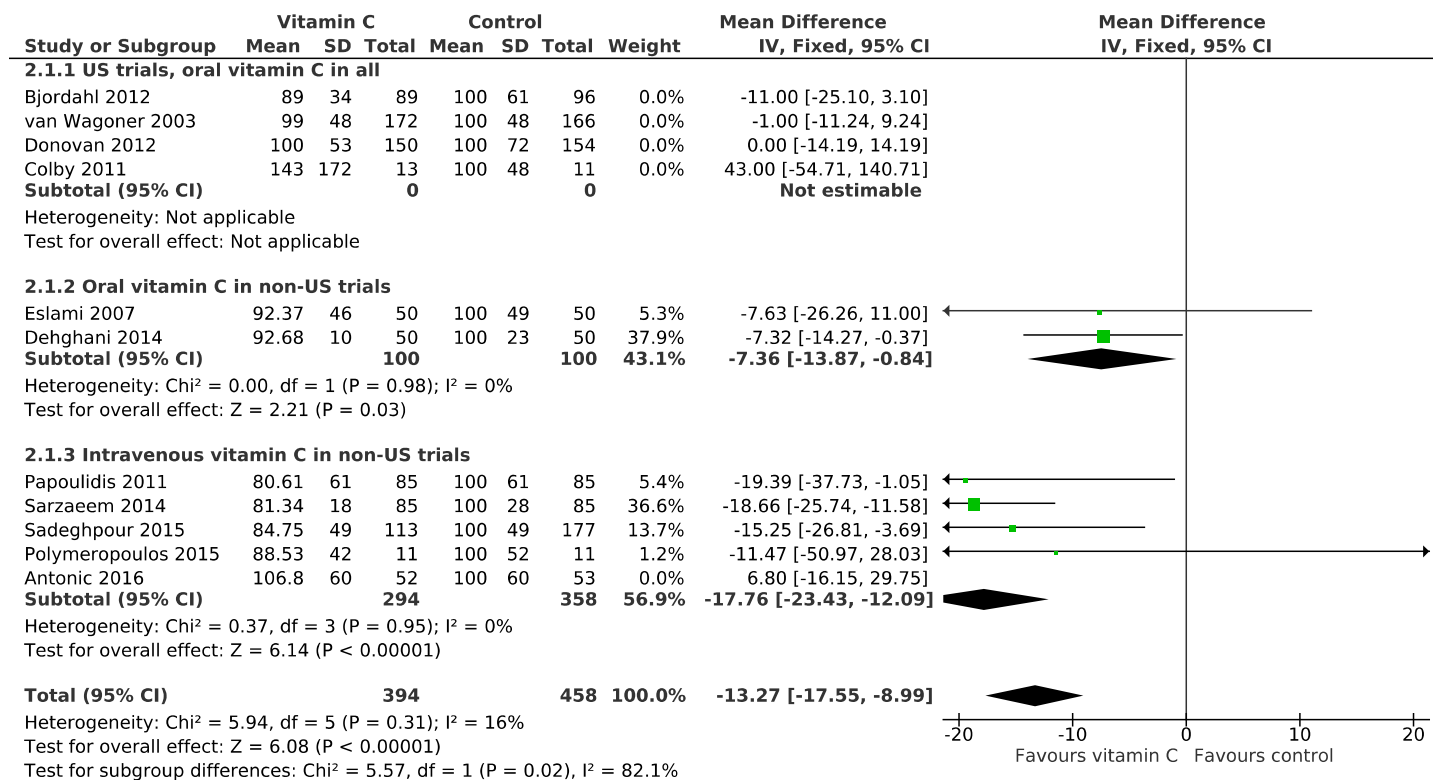

Supplement: 12872_2017_478_MOESM2_ESM.pdf [file 12872_2017_478_MOESM2_ESM.pdf]
